# Supplementary material for: Influence of the anatase/rutile ratio on the charge transport properties of TiO2-NTs arrays studied by dual wavelength opto-electrochemical impedance spectroscopy
Source: Royal Society of Chemistry journal article supplement (doi:10.1039/c7cp06270b), 2017-01-01
Supplement: c7cp06270b1.pdf [file c7cp06270b1.pdf]

## Supplementary Information:

### Influence of the anatase/rutile ratio on the charge transport properties of $\text{TiO}_2$ -NTs arrays studied by dual wavelength opto-electrochemical impedance spectroscopy.

T. Cottineau,<sup>a,†</sup> H. Cachet,<sup>b</sup> V. Keller<sup>a</sup> and E. M. M. Sutter<sup>b</sup>

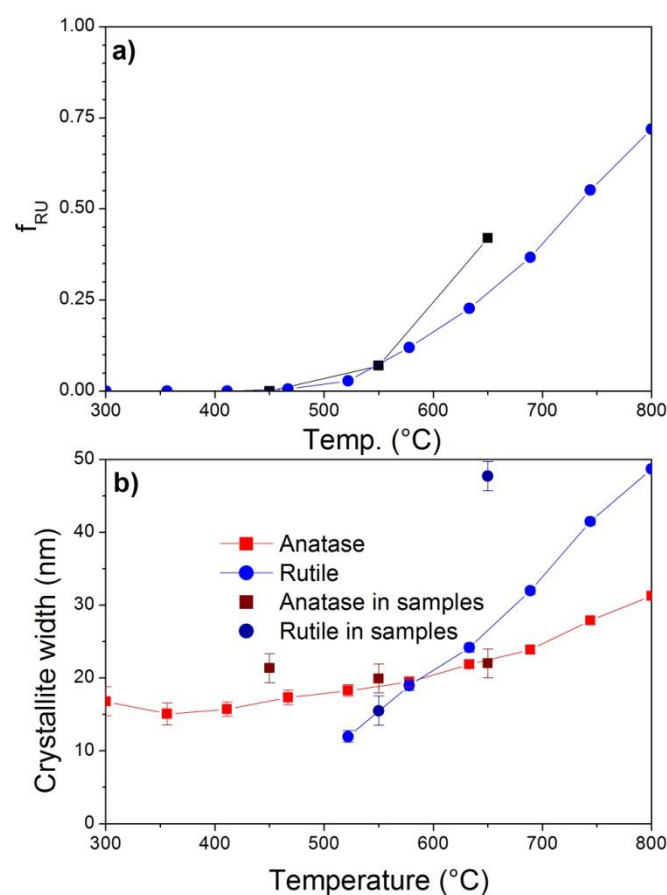

**Figure S1 :** a) Fraction of rutile phase depending on temperature for the in-situ experiment (blue circles) and for the three samples prepared for PEC experiments (black squares). B) Evolution of the anatase and rutile crystallite size as a function of the temperature for the in-situ experiment (red and blue) and for the three samples (wine and violet).
